# Supplementary material
Source: PubMed Central journal article supplement (PMC5712446)

### **A Bayesian Approach for Summarizing and Modeling Time-Series Exposure Data with Left Censoring**

E. Andres Houseman<sup>1</sup> and M. Abbas Virji<sup>2</sup>

<sup>1</sup>Oregon State University, College of Public Health and Human Sciences, Corvallis, OR.

<sup>2</sup>National Institute for Occupational Safety and Health, Respiratory Health Division, Morgantown, WV.

**Table S1: Comparison of Bayesian and frequentist estimates for healthcare workers TVOC dataset**

|                   | Posteriors (proposed mod) |      |       | OLS  |       | LME/AR(1) |       | LME/CAR(1) |       |
|-------------------|---------------------------|------|-------|------|-------|-----------|-------|------------|-------|
|                   | mean                      | med  | sd    | Est  | SE    | Est       | SE    | Est        | SE    |
| Admin             | 4.72                      | 4.48 | 0.129 | 4.79 | 0.030 | 4.15      | 0.146 | 4.74       | 0.120 |
| Adminster Med     | 4.70                      | 4.42 | 0.144 | 4.44 | 0.135 | 4.19      | 0.155 | 4.76       | 0.131 |
| Area Prep         | 4.71                      | 4.42 | 0.147 | 5.97 | 0.180 | 4.23      | 0.159 | 4.76       | 0.136 |
| Bath Patnt        | 4.65                      | 4.34 | 0.161 | 5.46 | 0.303 | 4.04      | 0.192 | 4.74       | 0.169 |
| Blast Mat         | 4.25                      | 3.58 | 0.327 | 4.72 | 0.940 | 3.73      | 0.300 | 4.42       | 0.300 |
| Blood Draw        | 5.07                      | 4.65 | 0.217 | 4.20 | 0.366 | 4.53      | 0.183 | 5.01       | 0.164 |
| Buff Floor        | 4.78                      | 4.50 | 0.147 | 6.70 | 0.181 | 4.22      | 0.161 | 4.80       | 0.137 |
| Clean BathRm      | 4.77                      | 4.51 | 0.137 | 4.89 | 0.154 | 4.21      | 0.155 | 4.79       | 0.130 |
| Cleaning          | 4.74                      | 4.48 | 0.134 | 4.68 | 0.066 | 4.16      | 0.148 | 4.73       | 0.122 |
| Clean Spill       | 4.52                      | 4.12 | 0.207 | 5.56 | 0.253 | 4.04      | 0.175 | 4.66       | 0.154 |
| Clean Window      | 4.72                      | 4.40 | 0.157 | 4.57 | 0.303 | 4.14      | 0.187 | 4.70       | 0.165 |
| Collect Equip     | 4.76                      | 4.45 | 0.156 | 4.06 | 0.251 | 4.18      | 0.190 | 4.73       | 0.169 |
| Cut/Grind Mat     | 4.79                      | 4.53 | 0.138 | 5.40 | 0.140 | 4.19      | 0.165 | 4.78       | 0.143 |
| Dental Lab        | 4.80                      | 4.54 | 0.139 | 5.93 | 0.162 | 4.23      | 0.168 | 4.82       | 0.145 |
| Dental Lab Wax    | 4.86                      | 4.58 | 0.144 | 5.66 | 0.189 | 4.22      | 0.194 | 4.81       | 0.172 |
| Disinfect Machn   | 5.01                      | 4.53 | 0.246 | 4.96 | 0.448 | 4.48      | 0.212 | 5.00       | 0.187 |
| Drying            | 4.37                      | 3.77 | 0.290 | 6.41 | 0.377 | 3.87      | 0.196 | 4.45       | 0.177 |
| Empty Trash       | 4.77                      | 4.52 | 0.136 | 4.59 | 0.087 | 4.24      | 0.149 | 4.81       | 0.124 |
| Floor Strip       | 4.66                      | 4.16 | 0.246 | 5.77 | 0.371 | 4.30      | 0.202 | 4.84       | 0.183 |
| Hand Wash         | 4.76                      | 4.49 | 0.140 | 4.38 | 0.341 | 4.18      | 0.172 | 4.76       | 0.150 |
| Lab Work          | 4.69                      | 4.43 | 0.139 | 4.16 | 0.097 | 4.12      | 0.157 | 4.71       | 0.132 |
| Lunch Break       | 4.76                      | 4.51 | 0.132 | 4.75 | 0.039 | 4.18      | 0.147 | 4.75       | 0.121 |
| Mat Handle        | 4.73                      | 4.34 | 0.204 | 4.96 | 0.310 | 4.31      | 0.188 | 4.74       | 0.169 |
| Mix Product       | 4.77                      | 4.43 | 0.169 | 5.14 | 0.366 | 4.46      | 0.184 | 4.71       | 0.164 |
| Mop Floor         | 4.72                      | 4.47 | 0.134 | 5.12 | 0.086 | 4.15      | 0.149 | 4.75       | 0.124 |
| Oper Med Equip    | 4.62                      | 4.28 | 0.175 | 4.18 | 0.246 | 4.15      | 0.174 | 4.76       | 0.150 |
| Patient Care      | 4.75                      | 4.49 | 0.137 | 4.78 | 0.060 | 4.16      | 0.149 | 4.71       | 0.124 |
| Patnt Care Chart  | 4.74                      | 4.50 | 0.130 | 4.77 | 0.056 | 4.19      | 0.147 | 4.76       | 0.122 |
| Pour/Mix Prod     | 4.79                      | 4.52 | 0.142 | 4.29 | 0.239 | 4.14      | 0.165 | 4.76       | 0.143 |
| Prep Med Dialysis | 4.78                      | 4.47 | 0.165 | 4.83 | 0.219 | 4.10      | 0.173 | 4.69       | 0.151 |
| Prep Proce Rm     | 4.61                      | 4.27 | 0.169 | 4.60 | 0.200 | 4.01      | 0.168 | 4.62       | 0.146 |
| Scope Clean       | 4.68                      | 4.12 | 0.283 | 4.74 | 0.294 | 4.28      | 0.205 | 4.60       | 0.188 |
| Sort Stock Delvr  | 4.70                      | 4.45 | 0.131 | 4.52 | 0.071 | 4.14      | 0.148 | 4.72       | 0.123 |
| Steril/Disinfe    | 4.77                      | 4.49 | 0.150 | 5.73 | 0.160 | 4.21      | 0.158 | 4.78       | 0.134 |
| Sweep/Vacm/Dust   | 4.70                      | 4.42 | 0.142 | 5.04 | 0.170 | 4.17      | 0.158 | 4.74       | 0.133 |
| Tear Down Equip   | 4.55                      | 4.19 | 0.176 | 5.22 | 0.248 | 4.10      | 0.173 | 4.67       | 0.151 |
| Training          | 5.43                      | 4.61 | 0.414 | 5.79 | 0.310 | 4.99      | 0.316 | 4.85       | 0.310 |
| Wash Equipment    | 4.70                      | 4.42 | 0.146 | 5.69 | 0.142 | 4.17      | 0.166 | 4.68       | 0.143 |
| Wipe WAlcoh       | 4.29                      | 3.77 | 0.265 | 6.67 | 0.482 | 3.93      | 0.209 | 4.50       | 0.191 |

All coefficients represent statistics for natural-log-transformed concentrations.

**Table S2: Comparison of Bayesian and frequentist estimates for healthcare workers TVOC dataset**

| <b>Pearson</b> | Post Mean | OLS   | LME/AR-1 | LME/CAR |
|----------------|-----------|-------|----------|---------|
| Post Mean      | 1.00      | -0.14 | 0.91     | 0.81    |
| OSL            | -0.14     | 1.00  | -0.01    | -0.17   |
| LME/AR-1       | 0.91      | -0.01 | 1.00     | 0.73    |
| LME/CAR        | 0.81      | -0.17 | 0.73     | 1.00    |

| <b>Spearman</b> | Post Mean | OLS   | LME/AR-1 | LME/CAR |
|-----------------|-----------|-------|----------|---------|
| Post Mean       | 1.00      | -0.01 | 0.66     | 0.72    |
| OSL             | -0.01     | 1.00  | 0.13     | 0.10    |
| LME/AR-1        | 0.66      | 0.13  | 1.00     | 0.75    |
| LME/CAR         | 0.72      | 0.10  | 0.75     | 1.00    |

**Table S3: Posterior distribution statistics for healthcare workers TVOC dataset with instrument effects**

|                                 | #    | Task Means ( $\alpha$ ) |      |       |       |       | Task SDs ( $\sigma_e$ ) |       |       |
|---------------------------------|------|-------------------------|------|-------|-------|-------|-------------------------|-------|-------|
|                                 |      | mean                    | sd   | med   | 2.5%  | 97.5% | med                     | 2.5%  | 97.5% |
| Admin                           | 4748 | 4.63                    | 0.32 | 4.64  | 3.99  | 5.26  | 0.482                   | 0.469 | 0.497 |
| Adminster Med                   | 242  | 4.61                    | 0.33 | 4.61  | 3.96  | 5.24  | 0.654                   | 0.589 | 0.731 |
| Area Prep                       | 136  | 4.62                    | 0.33 | 4.63  | 3.95  | 5.24  | 0.461                   | 0.378 | 0.548 |
| Bath Patnt                      | 48   | 4.55                    | 0.34 | 4.55  | 3.90  | 5.19  | 0.277                   | 0.205 | 0.386 |
| Blast Mat                       | 5    | 4.17                    | 0.43 | 4.18  | 3.27  | 5.06  | 0.552                   | 0.259 | 1.256 |
| Blood Draw                      | 33   | 4.98                    | 0.37 | 4.98  | 4.24  | 5.70  | 0.726                   | 0.515 | 1.041 |
| Buff Floor                      | 135  | 4.69                    | 0.33 | 4.70  | 4.04  | 5.35  | 0.555                   | 0.476 | 0.648 |
| Clean BathRm                    | 187  | 4.68                    | 0.33 | 4.69  | 4.04  | 5.33  | 0.337                   | 0.283 | 0.402 |
| Cleaning                        | 1022 | 4.65                    | 0.32 | 4.65  | 4.00  | 5.28  | 0.623                   | 0.586 | 0.661 |
| Clean Spill                     | 69   | 4.43                    | 0.37 | 4.42  | 3.70  | 5.15  | 0.985                   | 0.801 | 1.217 |
| Clean Window                    | 48   | 4.63                    | 0.33 | 4.64  | 3.95  | 5.28  | 0.320                   | 0.242 | 0.435 |
| Collect Equip                   | 70   | 4.68                    | 0.33 | 4.68  | 4.02  | 5.31  | 0.117                   | 0.083 | 0.166 |
| Cut/Grind Mat                   | 226  | 4.70                    | 0.32 | 4.71  | 4.03  | 5.33  | 0.156                   | 0.136 | 0.181 |
| Dental Lab                      | 169  | 4.72                    | 0.33 | 4.72  | 4.05  | 5.39  | 0.224                   | 0.197 | 0.257 |
| Dental Lab Wax                  | 123  | 4.78                    | 0.33 | 4.80  | 4.12  | 5.38  | 0.159                   | 0.139 | 0.187 |
| Disinfect Machn                 | 22   | 4.92                    | 0.39 | 4.91  | 4.21  | 5.71  | 0.725                   | 0.502 | 1.046 |
| Drying                          | 31   | 4.28                    | 0.42 | 4.29  | 3.47  | 5.12  | 1.198                   | 0.892 | 1.677 |
| Empty Trash                     | 582  | 4.68                    | 0.32 | 4.69  | 4.02  | 5.30  | 0.644                   | 0.600 | 0.695 |
| Floor Strip                     | 32   | 4.58                    | 0.38 | 4.58  | 3.86  | 5.34  | 0.958                   | 0.719 | 1.304 |
| Hand Wash                       | 38   | 4.67                    | 0.33 | 4.68  | 4.01  | 5.32  | 0.084                   | 0.048 | 0.193 |
| Lab Work                        | 474  | 4.60                    | 0.33 | 4.61  | 3.92  | 5.23  | 0.339                   | 0.309 | 0.371 |
| Lunch Break                     | 2957 | 4.67                    | 0.32 | 4.67  | 4.01  | 5.29  | 0.389                   | 0.374 | 0.403 |
| Mat Handle                      | 46   | 4.63                    | 0.36 | 4.62  | 3.86  | 5.29  | 0.815                   | 0.658 | 1.040 |
| Mix Product                     | 33   | 4.68                    | 0.34 | 4.68  | 4.04  | 5.36  | 0.344                   | 0.208 | 0.611 |
| Mop Floor                       | 599  | 4.63                    | 0.32 | 4.63  | 3.98  | 5.26  | 0.576                   | 0.536 | 0.620 |
| Oper Med Equip                  | 73   | 4.53                    | 0.34 | 4.53  | 3.85  | 5.18  | 0.606                   | 0.454 | 0.785 |
| Patient Care                    | 1243 | 4.66                    | 0.32 | 4.66  | 4.01  | 5.28  | 0.601                   | 0.570 | 0.635 |
| Patnt Care Chart                | 1415 | 4.65                    | 0.32 | 4.66  | 4.01  | 5.28  | 0.354                   | 0.337 | 0.374 |
| Pour/Mix Prod                   | 77   | 4.70                    | 0.32 | 4.71  | 4.04  | 5.30  | 0.322                   | 0.250 | 0.420 |
| Prep Med Dialysis               | 92   | 4.70                    | 0.34 | 4.70  | 4.03  | 5.36  | 0.580                   | 0.488 | 0.707 |
| Prep Proce Rm                   | 110  | 4.52                    | 0.34 | 4.52  | 3.85  | 5.14  | 0.661                   | 0.555 | 0.788 |
| Scope Clean                     | 51   | 4.58                    | 0.40 | 4.59  | 3.76  | 5.37  | 0.979                   | 0.743 | 1.297 |
| Sort Stock Delvr                | 866  | 4.61                    | 0.32 | 4.62  | 3.98  | 5.23  | 0.394                   | 0.366 | 0.424 |
| Steril/Disinfe                  | 172  | 4.69                    | 0.33 | 4.69  | 4.01  | 5.32  | 0.814                   | 0.709 | 0.932 |
| Sweep/Vacm/Dust                 | 152  | 4.61                    | 0.33 | 4.63  | 3.95  | 5.26  | 0.457                   | 0.378 | 0.548 |
| Tear Down Equip                 | 72   | 4.46                    | 0.34 | 4.47  | 3.77  | 5.10  | 0.646                   | 0.529 | 0.809 |
| Training                        | 46   | 5.35                    | 0.49 | 5.35  | 4.40  | 6.30  | 1.101                   | 0.830 | 1.496 |
| Wash Equipment                  | 220  | 4.60                    | 0.33 | 4.61  | 3.93  | 5.24  | 0.285                   | 0.251 | 0.328 |
| Wipe WAlcoh                     | 19   | 4.21                    | 0.40 | 4.21  | 3.42  | 4.97  | 0.877                   | 0.660 | 1.263 |
| Instrument #101787              | 2700 | 0.00                    | 0.00 | 0.00  | 0.00  | 0.00  |                         |       |       |
| Instrument #101806              | 3314 | -0.43                   | 0.42 | -0.43 | -1.28 | 0.36  |                         |       |       |
| Instrument #101813              | 1351 | 0.68                    | 0.56 | 0.68  | -0.47 | 1.75  |                         |       |       |
| Instrument #101814              | 901  | -0.07                   | 0.62 | -0.07 | -1.29 | 1.14  |                         |       |       |
| Instrument #101876              | 3385 | 0.42                    | 0.44 | 0.41  | -0.47 | 1.30  |                         |       |       |
| Instrument #101882              | 3710 | 0.15                    | 0.42 | 0.14  | -0.64 | 1.00  |                         |       |       |
| Instrument #901547              | 1323 | -0.05                   | 0.58 | -0.05 | -1.22 | 1.02  |                         |       |       |
| Spline SD ( $\sigma_e$ )        |      |                         |      |       |       |       | 1.68                    | 1.65  | 1.73  |
| Random Effect SD ( $\sigma_a$ ) |      |                         |      |       |       |       | 1.82                    | 1.65  | 2.01  |

All coefficients represent statistics for natural-log-transformed concentrations.

**Table S4: Model Posterior Statistics for NSAM (by Source Enclosure)**

|                              |                       | #   | mean | sd    | 2.5%  | median | 97.5% |
|------------------------------|-----------------------|-----|------|-------|-------|--------|-------|
| Task Means ( $\alpha$ )      | Prep scooping         | 9   | 4.3  | 0.18  | 3.9   | 4.3    | 4.6   |
|                              | Receiving powder      | 135 | 3.7  | 0.05  | 3.6   | 3.7    | 3.8   |
|                              | Scooping LiOH         | 5   | 4.2  | 0.21  | 3.8   | 4.2    | 4.6   |
|                              | Scooping TiO2         | 9   | 4.2  | 0.18  | 3.9   | 4.2    | 4.6   |
|                              | Shaking out baghouse  | 10  | 4.9  | 0.17  | 4.6   | 4.9    | 5.2   |
| Covariate ( $\beta$ )        | Source enclosure: Yes |     | 0.5  | 0.15  | 0.2   | 0.5    | 0.8   |
| Task SDs ( $\sigma_e$ )      | Prep scooping         |     |      |       | 0.048 | 0.069  | 0.132 |
|                              | Receiving powder      |     |      |       | 0.131 | 0.151  | 0.174 |
|                              | Scooping LiOH         |     |      |       | 0.044 | 0.068  | 0.146 |
|                              | Scooping TiO2         |     |      |       | 0.042 | 0.059  | 0.100 |
|                              | Shaking out baghouse  |     |      |       | 0.049 | 0.073  | 0.127 |
| Spline SD ( $\sigma_\zeta$ ) |                       |     |      | 0.261 | 0.318 | 0.398  |       |

All coefficients represent statistics for natural-log-transformed concentrations.

**Table S5: Posterior distribution statistics for all nanoparticle datasets**

| Covariate Model:              |       | Source Enclosure     |         |        |           |                               | Covariate Model: |      | Enclosure Type       |        |           |  |  |
|-------------------------------|-------|----------------------|---------|--------|-----------|-------------------------------|------------------|------|----------------------|--------|-----------|--|--|
|                               |       | Posterior Statistics |         |        |           |                               |                  |      | Posterior Statistics |        |           |  |  |
|                               | mean  | sd                   | 2.5%ile | median | 97.5%tile |                               | mean             | sd   | 2.5%ile              | median | 97.5%tile |  |  |
| <b>CPC</b>                    |       |                      |         |        |           | <b>CPC</b>                    |                  |      |                      |        |           |  |  |
| (Intercept)*                  | 10.41 | 0.22                 | 10.01   | 10.41  | 10.86     | (Intercept)*                  | 10.46            | 0.22 | 9.99                 | 10.46  | 10.85     |  |  |
| Task: Receiving powder        | -0.56 | 0.23                 | -1.02   | -0.56  | -0.13     | Task: Receiving powder        | -0.60            | 0.24 | -1.03                | -0.60  | -0.11     |  |  |
| Task: Scooping TiO2           | -0.03 | 0.05                 | -0.14   | -0.03  | 0.08      | Task: Scooping TiO2           | -0.03            | 0.06 | -0.13                | -0.03  | 0.09      |  |  |
| Task: Shaking out baghouse    | 0.52  | 0.29                 | -0.05   | 0.51   | 1.05      | Task: Shaking out baghouse    | 0.45             | 0.30 | -0.17                | 0.45   | 1.03      |  |  |
| Source enclosure:Complete     | 0.07  | 0.14                 | -0.22   | 0.07   | 0.36      | Enclosure Type: None          | 0.02             | 0.10 | -0.17                | 0.02   | 0.20      |  |  |
| Task SD: Prep scooping        |       |                      | 0.043   | 0.059  | 0.106     | Task SD: Prep scooping        |                  |      | 0.042                | 0.060  | 0.102     |  |  |
| Task SD: Receiving powder     |       |                      | 0.067   | 0.079  | 0.096     | Task SD: Receiving powder     |                  |      | 0.067                | 0.079  | 0.096     |  |  |
| Task SD: Scooping TiO2        |       |                      | 0.044   | 0.065  | 0.123     | Task SD: Scooping TiO2        |                  |      | 0.044                | 0.064  | 0.126     |  |  |
| Task SD: Shaking out baghouse |       |                      | 0.060   | 0.081  | 0.121     | Task SD: Shaking out baghouse |                  |      | 0.060                | 0.081  | 0.119     |  |  |
| Spline SD                     |       |                      | 0.482   | 0.578  | 0.713     | Spline SD                     |                  |      | 0.488                | 0.583  | 0.712     |  |  |
| <b>Nsam</b>                   |       |                      |         |        |           | <b>Nsam</b>                   |                  |      |                      |        |           |  |  |
| (Intercept)*                  | 4.26  | 0.18                 | 3.92    | 4.26   | 4.61      | (Intercept)*                  | 4.71             | 0.12 | 4.49                 | 4.71   | 4.95      |  |  |
| Task: Receiving powder        | -0.60 | 0.18                 | -0.95   | -0.61  | -0.28     | Task: Receiving powder        | -1.03            | 0.13 | -1.29                | -1.02  | -0.77     |  |  |
| Task: Scooping LiOH           | -0.04 | 0.13                 | -0.27   | -0.04  | 0.23      | Task: Scooping LiOH           | -0.02            | 0.14 | -0.30                | -0.02  | 0.25      |  |  |
| Task: Scooping TiO2           | -0.01 | 0.05                 | -0.12   | -0.01  | 0.09      | Task: Scooping TiO2           | -0.01            | 0.06 | -0.13                | -0.01  | 0.10      |  |  |
| Task: Shaking out baghouse    | 0.64  | 0.25                 | 0.18    | 0.63   | 1.13      | Task: Shaking out baghouse    | 0.10             | 0.30 | -0.48                | 0.10   | 0.69      |  |  |
| Source enclosure:Complete     | 0.46  | 0.15                 | 0.16    | 0.45   | 0.76      | Enclosure Type: None          | 0.09             | 0.18 | -0.25                | 0.08   | 0.45      |  |  |
| Task SD: Prep scooping        |       |                      | 0.048   | 0.069  | 0.132     | Task SD: Prep scooping        |                  |      | 0.048                | 0.071  | 0.129     |  |  |
| Task SD: Receiving powder     |       |                      | 0.131   | 0.151  | 0.174     | Task SD: Receiving powder     |                  |      | 0.130                | 0.151  | 0.175     |  |  |
| Task SD: Scooping LiOH        |       |                      | 0.044   | 0.068  | 0.146     | Task SD: Scooping LiOH        |                  |      | 0.045                | 0.067  | 0.138     |  |  |
| Task SD: Scooping TiO2        |       |                      | 0.042   | 0.059  | 0.100     | Task SD: Scooping TiO2        |                  |      | 0.041                | 0.059  | 0.102     |  |  |
| Task SD: Shaking out baghouse |       |                      | 0.049   | 0.073  | 0.127     | Task SD: Shaking out baghouse |                  |      | 0.050                | 0.073  | 0.125     |  |  |
| Spline SD                     |       |                      | 0.261   | 0.318  | 0.398     | Spline SD                     |                  |      | 0.286                | 0.349  | 0.421     |  |  |
| <b>OPC</b>                    |       |                      |         |        |           | <b>OPC</b>                    |                  |      |                      |        |           |  |  |
| (Intercept)*                  | 4.59  | 0.20                 | 4.19    | 4.57   | 4.95      | (Intercept)*                  | 4.11             | 0.14 | 3.83                 | 4.11   | 4.38      |  |  |
| Task: Receiving powder        | 1.41  | 0.20                 | 1.03    | 1.43   | 1.81      | Task: Receiving powder        | 1.84             | 0.15 | 1.54                 | 1.84   | 2.12      |  |  |
| Task: Scooping LiOH           | 0.51  | 0.33                 | -0.15   | 0.51   | 1.18      | Task: Scooping LiOH           | 0.47             | 0.34 | -0.18                | 0.47   | 1.16      |  |  |
| Task: Scooping TiO2           | 0.01  | 0.07                 | -0.12   | 0.00   | 0.16      | Task: Scooping TiO2           | 0.01             | 0.08 | -0.14                | 0.00   | 0.18      |  |  |
| Task: Shaking out baghouse    | 0.39  | 0.23                 | -0.04   | 0.39   | 0.82      | Task: Shaking out baghouse    | 0.73             | 0.22 | 0.32                 | 0.73   | 1.18      |  |  |
| Source enclosure:Complete     | -0.49 | 0.13                 | -0.73   | -0.49  | -0.22     | Enclosure Type: None          | 0.13             | 0.11 | -0.08                | 0.12   | 0.33      |  |  |
| Task SD: Prep scooping        |       |                      | 0.045   | 0.071  | 0.153     | Task SD: Prep scooping        |                  |      | 0.045                | 0.070  | 0.161     |  |  |
| Task SD: Receiving powder     |       |                      | 0.076   | 0.087  | 0.101     | Task SD: Receiving powder     |                  |      | 0.075                | 0.088  | 0.104     |  |  |
| Task SD: Scooping LiOH        |       |                      | 0.246   | 0.465  | 0.990     | Task SD: Scooping LiOH        |                  |      | 0.225                | 0.450  | 1.006     |  |  |
| Task SD: Scooping TiO2        |       |                      | 0.049   | 0.080  | 0.164     | Task SD: Scooping TiO2        |                  |      | 0.050                | 0.080  | 0.172     |  |  |
| Task SD: Shaking out baghouse |       |                      | 0.109   | 0.143  | 0.198     | Task SD: Shaking out baghouse |                  |      | 0.108                | 0.144  | 0.200     |  |  |
| Spline SD                     |       |                      | 0.328   | 0.393  | 0.482     | Spline SD                     |                  |      | 0.356                | 0.426  | 0.514     |  |  |
| <b>SMPS</b>                   |       |                      |         |        |           | <b>SMPS</b>                   |                  |      |                      |        |           |  |  |
| (Intercept)*                  | 10.09 | 0.21                 | 9.74    | 10.06  | 10.51     | (Intercept)*                  | 10.09            | 0.15 | 9.78                 | 10.09  | 10.38     |  |  |
| Task: Receiving powder        | -0.74 | 0.22                 | -1.16   | -0.71  | -0.33     | Task: Receiving powder        | -0.72            | 0.15 | -1.01                | -0.72  | -0.37     |  |  |
| Task: Scooping LiOH           | 0.04  | 0.15                 | -0.26   | 0.04   | 0.32      | Task: Scooping LiOH           | 0.05             | 0.15 | -0.27                | 0.06   | 0.34      |  |  |
| Task: Scooping TiO2           | -0.03 | 0.05                 | -0.12   | -0.03  | 0.08      | Task: Scooping TiO2           | -0.03            | 0.05 | -0.13                | -0.03  | 0.08      |  |  |
| Task: Shaking out baghouse    | 0.42  | 0.27                 | -0.13   | 0.43   | 0.93      | Task: Shaking out baghouse    | 0.40             | 0.23 | -0.07                | 0.40   | 0.85      |  |  |
| Source enclosure:Complete     | 0.08  | 0.11                 | -0.14   | 0.08   | 0.28      | Enclosure Type: None          | 0.00             | 0.07 | -0.13                | 0.00   | 0.14      |  |  |
| Task SD: Prep scooping        |       |                      | 0.042   | 0.061  | 0.112     | Task SD: Prep scooping        |                  |      | 0.043                | 0.060  | 0.111     |  |  |
| Task SD: Receiving powder     |       |                      | 0.050   | 0.058  | 0.067     | Task SD: Receiving powder     |                  |      | 0.050                | 0.057  | 0.067     |  |  |
| Task SD: Scooping LiOH        |       |                      | 0.045   | 0.068  | 0.144     | Task SD: Scooping LiOH        |                  |      | 0.046                | 0.071  | 0.148     |  |  |
| Task SD: Scooping TiO2        |       |                      | 0.042   | 0.059  | 0.102     | Task SD: Scooping TiO2        |                  |      | 0.042                | 0.059  | 0.102     |  |  |
| Task SD: Shaking out baghouse |       |                      | 0.165   | 0.224  | 0.341     | Task SD: Shaking out baghouse |                  |      | 0.165                | 0.225  | 0.331     |  |  |
| Spline SD                     |       |                      | 0.470   | 0.555  | 0.660     | Spline SD                     |                  |      | 0.474                | 0.557  | 0.671     |  |  |

\* Reference Task = Prep scooping. All coefficients represent statistics for natural-log-transformed concentrations.

**Table S6: Frequentist estimates for nanoparticle data sets**

| Covariate Model: Source Enclosure |         |         |         |       | Covariate Model: Enclosure Type |         |         |         |        |
|-----------------------------------|---------|---------|---------|-------|---------------------------------|---------|---------|---------|--------|
|                                   | OLS     | RI      | CAR     | ARMA  |                                 | OLS     | RI      | CAR     | ARMA   |
| CPC                               |         |         |         |       | CPC                             |         |         |         |        |
| (Intercept)*                      | 9.96    | 9.96    | 10.45   | 10.11 | (Intercept)*                    | 10.42   | 10.42   | 10.47   | 9.98   |
| Task: Receiving powder            | -0.17   | -0.17   | -0.46   | 0.06  | Task: Receiving powder          | -0.61   | -0.61   | -0.47   | 0.10   |
| Task: Scooping TiO2               | 0.04    | 0.04    | -0.02   | -0.01 | Task: Scooping TiO2             | 0.04    | 0.04    | -0.02   | -0.01  |
| Task: Shaking out baghouse        | 0.94    | 0.94    | 0.38    | 0.28  | Task: Shaking out baghouse      | 0.11    | 0.11    | 0.36    | 0.52   |
| Source enclosure:Complete         | 0.46    | 0.46    | 0.02    | -0.33 | Enclosure Type: None            | 0.37    | 0.37    | 0.01    | -0.03  |
| sigma                             | 0.460   | 0.460   | 0.586   | 0.140 | sigma                           | 0.470   | 0.470   | 0.584   | 0.141  |
| ARMA(p,q)                         |         |         |         | (3,4) | ARMA(p,q)                       |         |         |         | (5, 4) |
| Durbin-Watson p value             | <0.0001 | <0.0001 | <0.0001 | 0.49  | Durbin-Watson p value           | <0.0001 | <0.0001 | <0.0001 | 0.30   |
| Nsam                              |         |         |         |       | Nsam                            |         |         |         |        |
| (Intercept)*                      | 4.16    | 4.16    | 4.61    | 4.45  | (Intercept)*                    | 4.80    | 4.80    | 4.75    | 4.47   |
| Task: Receiving powder            | -0.51   | -0.51   | -0.90   | -0.62 | Task: Receiving powder          | -1.12   | -1.12   | -1.03   | -0.64  |
| Task: Scooping LiOH               | -0.21   | -0.21   | -0.02   | 0.07  | Task: Scooping LiOH             | -0.21   | -0.21   | -0.01   | 0.07   |
| Task: Scooping TiO2               | -0.20   | -0.20   | -0.02   | 0.00  | Task: Scooping TiO2             | -0.20   | -0.20   | -0.02   | 0.00   |
| Task: Shaking out baghouse        | 0.80    | 0.80    | 0.33    | 0.03  | Task: Shaking out baghouse      | -0.45   | -0.45   | 0.16    | 0.00   |
| Source enclosure:Complete         | 0.65    | 0.65    | 0.14    | 0.02  | Enclosure Type: None            | 0.60    | 0.60    | 0.03    | 0.02   |
| sigma                             | 0.298   | 0.298   | 0.353   | 0.141 | sigma                           | 0.329   | 0.329   | 0.371   | 0.141  |
| ARMA(p,q)                         |         |         |         | (8,4) | ARMA(p,q)                       |         |         |         | (8, 4) |
| Durbin-Watson p value             | <0.0001 | <0.0001 | <0.0001 | 0.42  | Durbin-Watson p value           | <0.0001 | <0.0001 | <0.0001 | 0.42   |
| OPC                               |         |         |         |       | OPC                             |         |         |         |        |
| (Intercept)*                      | 4.51    | 4.51    | 4.81    | 5.20  | (Intercept)*                    | 3.97    | 3.97    | 4.58    | 4.35   |
| Task: Receiving powder            | 1.51    | 1.51    | 0.85    | 0.79  | Task: Receiving powder          | 2.02    | 2.02    | 0.87    | 1.44   |
| Task: Scooping LiOH               | 0.86    | 0.86    | 0.14    | 0.47  | Task: Scooping LiOH             | 0.86    | 0.86    | 0.13    | 0.32   |
| Task: Scooping TiO2               | 0.25    | 0.25    | 0.01    | 0.10  | Task: Scooping TiO2             | 0.25    | 0.25    | 0.01    | 0.01   |
| Task: Shaking out baghouse        | 0.45    | 0.45    | 0.16    | 0.25  | Task: Shaking out baghouse      | 0.64    | 0.64    | 0.24    | 1.19   |
| Source enclosure:Complete         | -0.55   | -0.55   | -0.28   | -1.10 | Enclosure Type: None            | 0.36    | 0.36    | 0.16    | 0.20   |
| sigma                             | 0.298   | 0.298   | 0.775   | 0.182 | sigma                           | 0.319   | 0.319   | 1.031   | 0.195  |
| ARMA(p,q)                         |         |         |         | (4,3) | ARMA(p,q)                       |         |         |         | (3, 3) |
| Durbin-Watson p value             | <0.0001 | <0.0001 | <0.0001 | 0.75  | Durbin-Watson p value           | <0.0001 | <0.0001 | <0.0001 | 0.71   |
| SMPS                              |         |         |         |       | SMPS                            |         |         |         |        |
| (Intercept)*                      | 9.37    | 9.37    | 10.06   | 9.50  | (Intercept)*                    | 10.01   | 10.01   | 10.10   | 9.59   |
| Task: Receiving powder            | -0.06   | -0.06   | -0.63   | 0.11  | Task: Receiving powder          | -0.66   | -0.66   | -0.66   | -0.01  |
| Task: Scooping LiOH               | 0.24    | 0.24    | 0.05    | 0.04  | Task: Scooping LiOH             | 0.24    | 0.24    | 0.05    | 0.06   |
| Task: Scooping TiO2               | 0.06    | 0.06    | -0.02   | -0.01 | Task: Scooping TiO2             | 0.06    | 0.06    | -0.02   | -0.01  |
| Task: Shaking out baghouse        | 1.12    | 1.12    | 0.37    | 0.83  | Task: Shaking out baghouse      | -0.02   | -0.02   | 0.33    | 0.74   |
| Source enclosure:Complete         | 0.64    | 0.64    | 0.04    | 0.08  | Enclosure Type: None            | 0.50    | 0.50    | 0.00    | 0.01   |
| sigma                             | 0.489   | 0.489   | 0.572   | 0.148 | sigma                           | 0.507   | 0.507   | 0.575   | 0.156  |
| ARMA(p,q)                         |         |         |         | (7,4) | ARMA(p,q)                       |         |         |         | (4, 2) |
| Durbin-Watson p value             | <0.0001 | <0.0001 | <0.0001 | 0.57  | Durbin-Watson p value           | <0.0001 | <0.0001 | <0.0001 | 0.34   |

All coefficients represent statistics for natural-log-transformed concentrations.

Figure S1: Observed vs. predicted for healthcare workers TVOC dataset

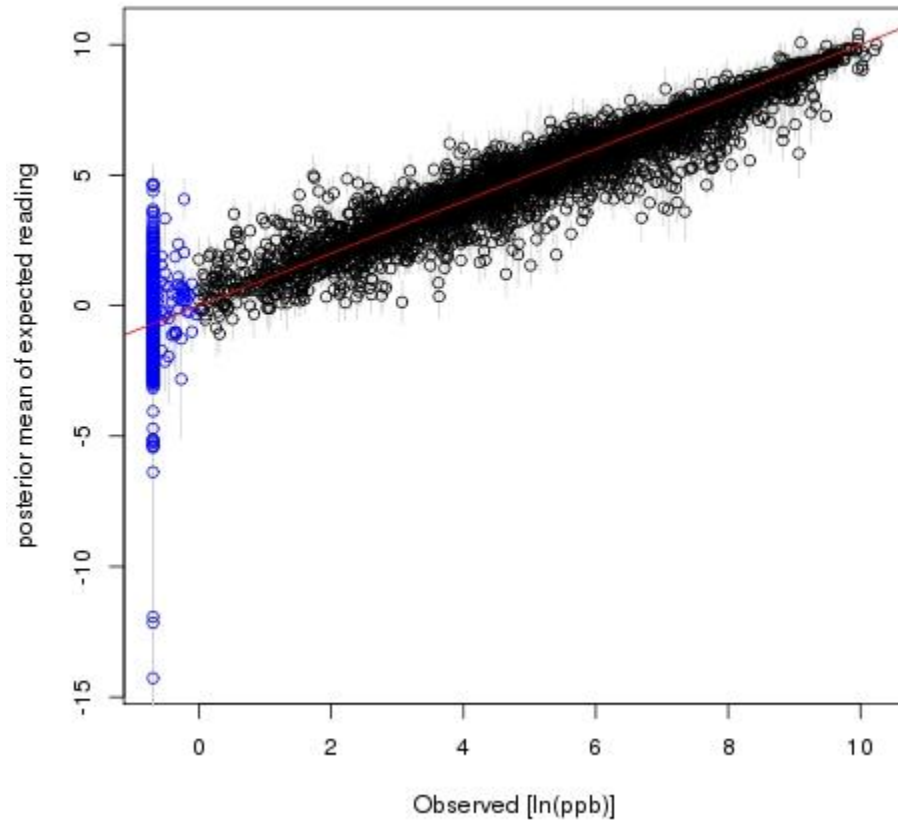

Note: vertical lines show 95% credible intervals. Red line represents the identity. LOD data shown in blue, with “observed” set at LOD/2.



**Figure S2: Autocorrelation Profiles for Different Knot Configurations and Different Variance Components**

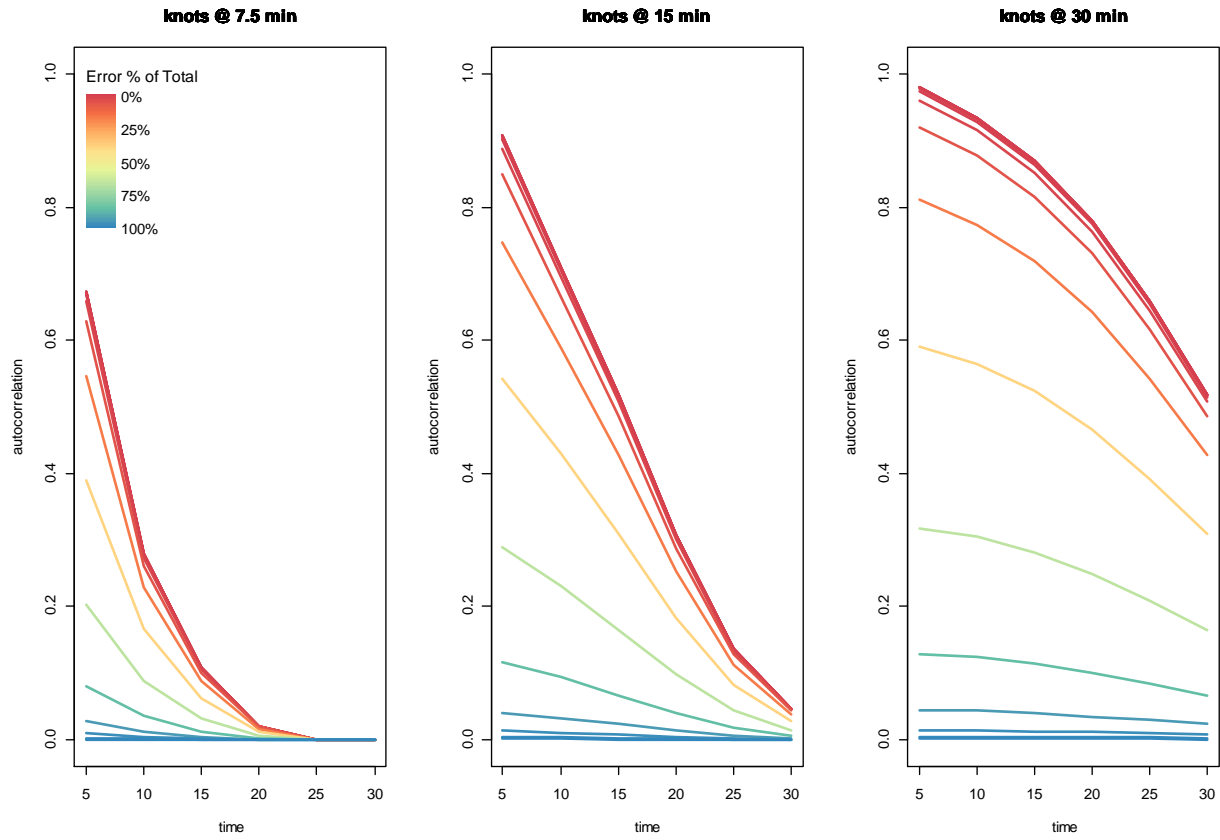

Plots show autocorrelation profiles,  $autocorr = \frac{\sigma_{\zeta}^2 \mathbf{b}(0)^T \mathbf{b}(t)}{\{\sigma_{\zeta}^2 \mathbf{b}(0)^T \mathbf{b}(t) + \sigma_e^2\}}$ , for different knot configurations. Here, time 0 is 12 noon, time  $t$  (x-axis) is the number of minutes past noon, and the B-spline basis is constructed for 60 minutes centered at noon and boundaries at midnight (on either side). Thus, the middle panel is based on the same B-spline basis used for our primary data example (healthcare TVOCs). As shown in the left panel legend, line color represents the fraction of total variation contributed by  $\sigma_e^2$ , i.e.  $autocorr = \sigma_e^2 / \{\sigma_{\zeta}^2 \mathbf{b}(0)^T \mathbf{b}(0) + \sigma_e^2\}$ . In these knot configurations,  $\mathbf{b}(0)^T \mathbf{b}(0)$  ranged from 0.43 to 0.47.

Figure S3: Autocorrelation Profiles for NSAM Data Set

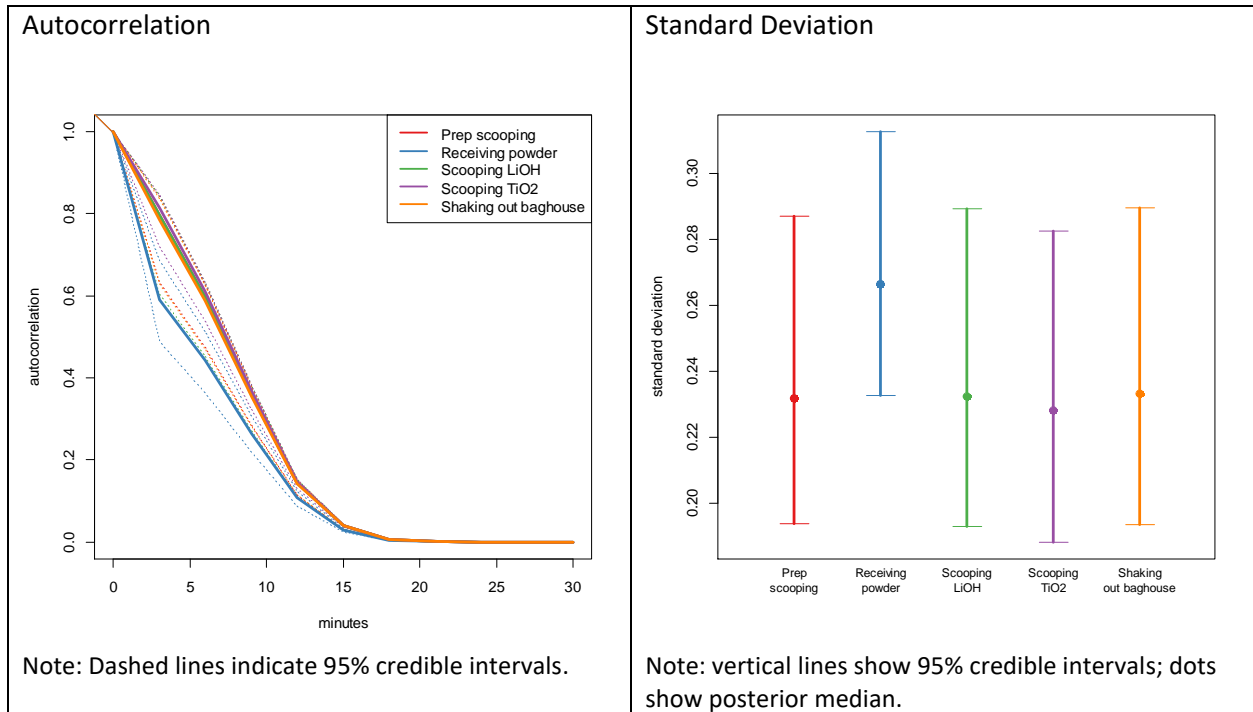

Figure S4: Comparison with Frequentist Methods

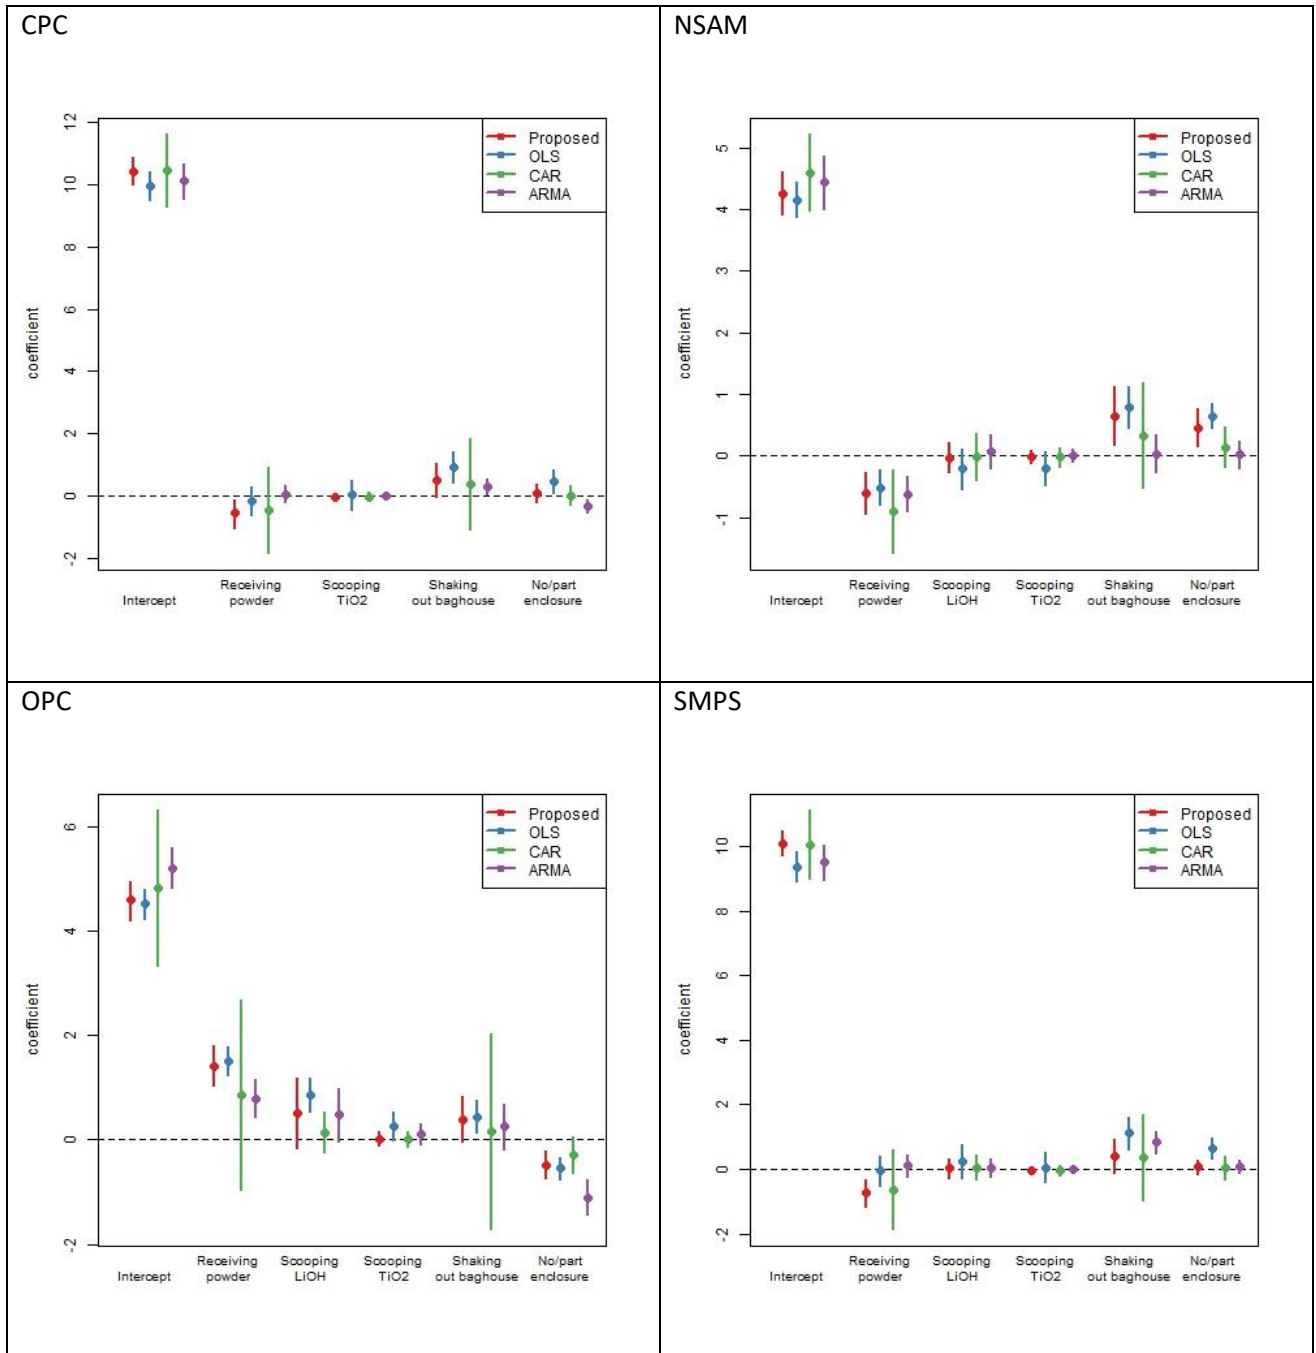

Note: vertical lines show 95% credible intervals (proposed method) or 95% confidence intervals (frequentist methods); dots show posterior mean (proposed method) or estimates (frequentist methods).

Figure S5: Observed vs. predicted for nanoparticle models (with *Source Enclosure* covariate)

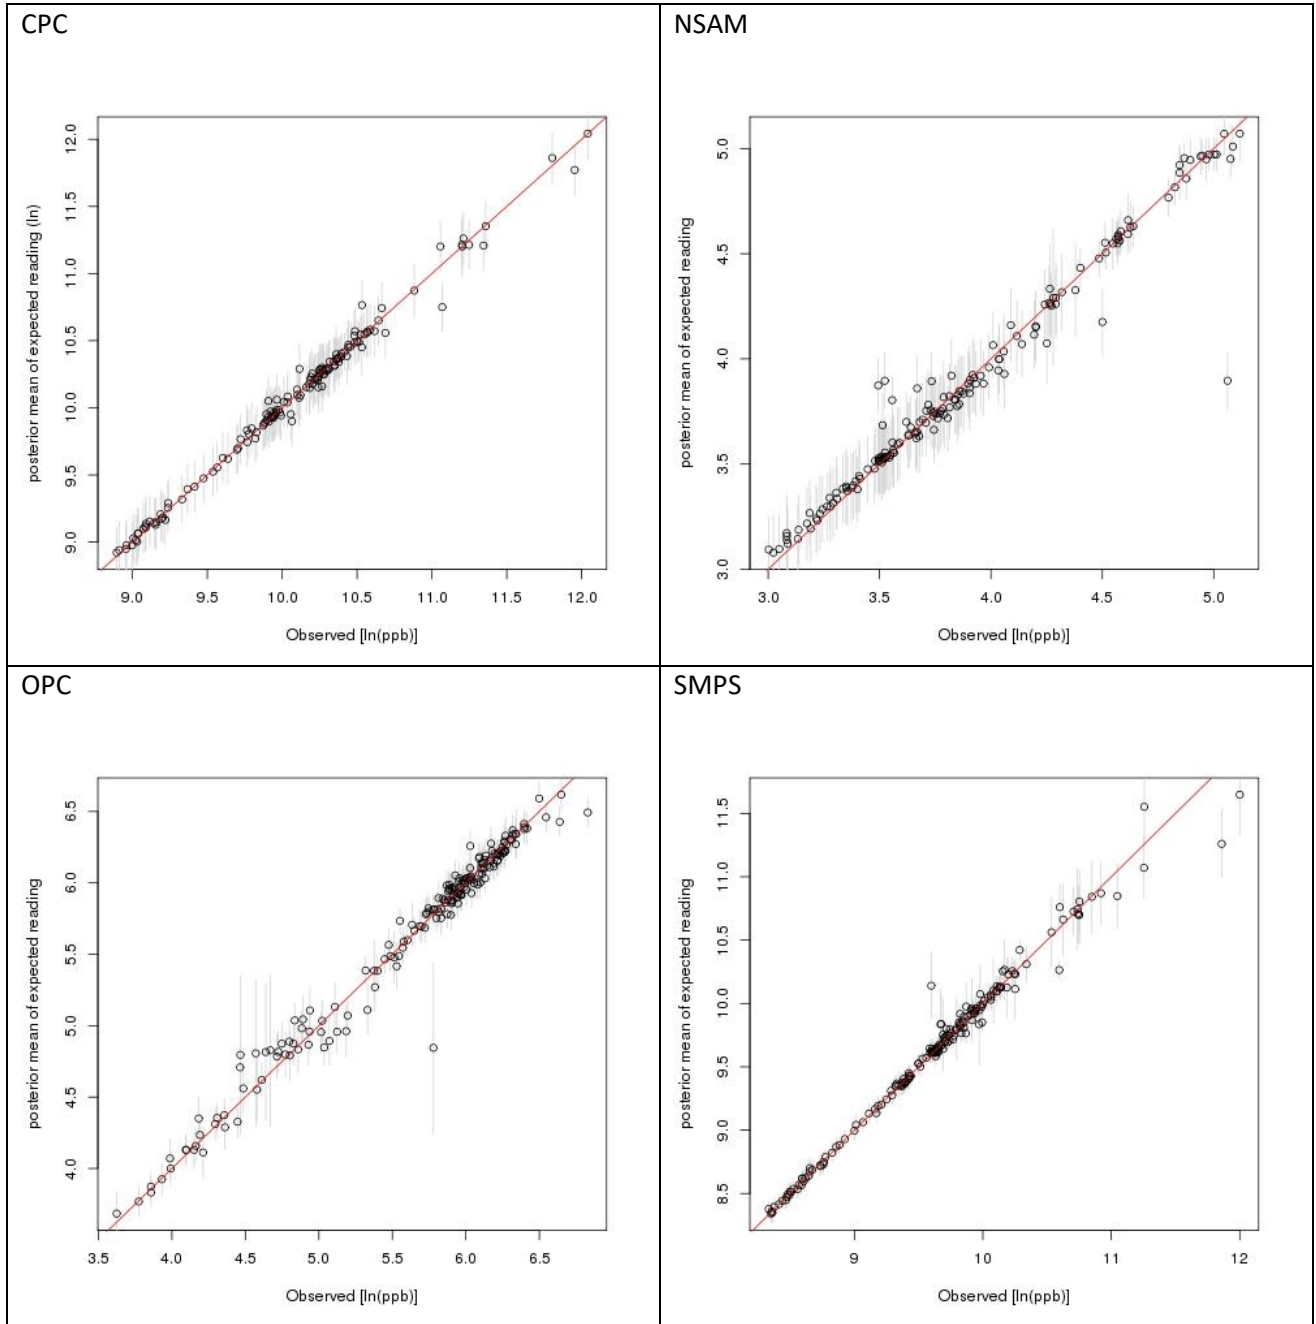

Note: vertical lines show 95% credible intervals. Red line represents the identity.

Figure S6: Example Time Series - NSAM data set, Baghouse location, March 16, 2006

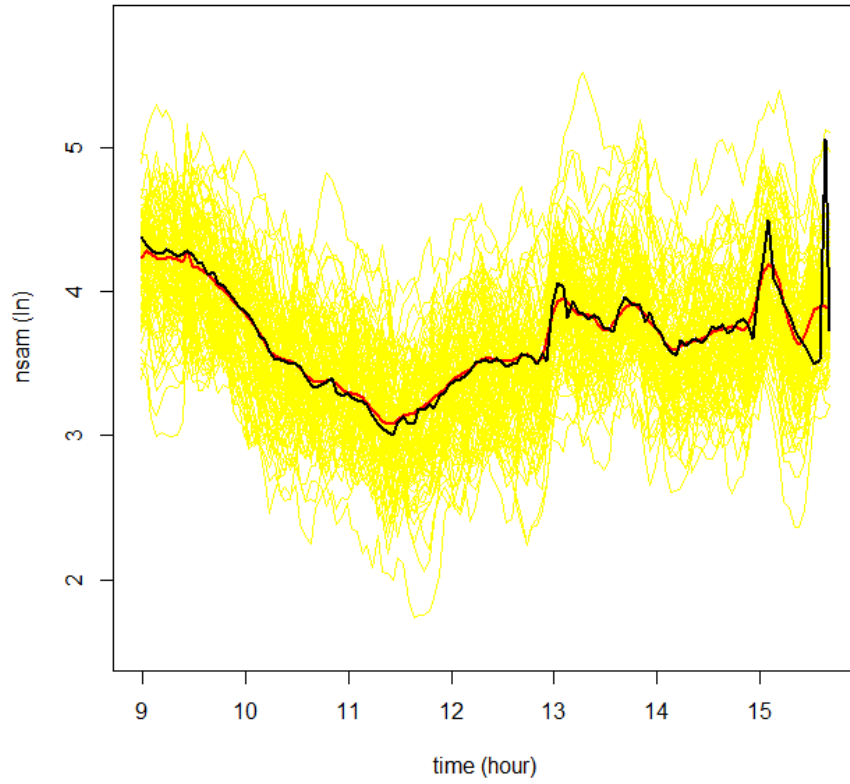

Figure S7: Percent of left-censored values in simulation experiments

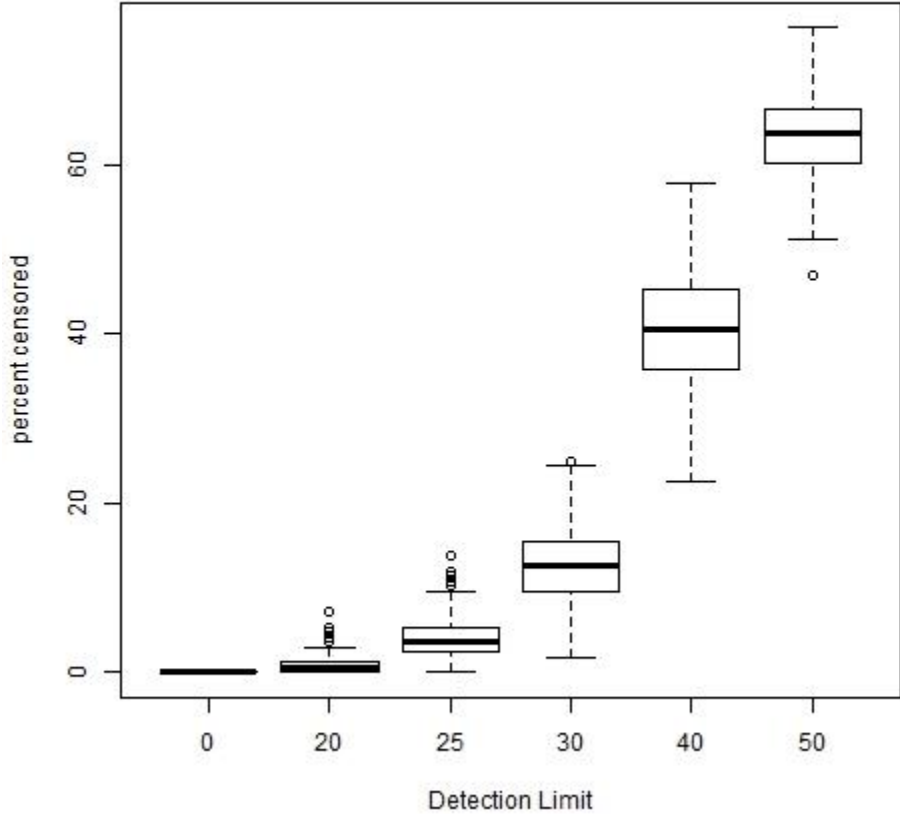

Figure S8: Root-mean-square-error for simulation experiment

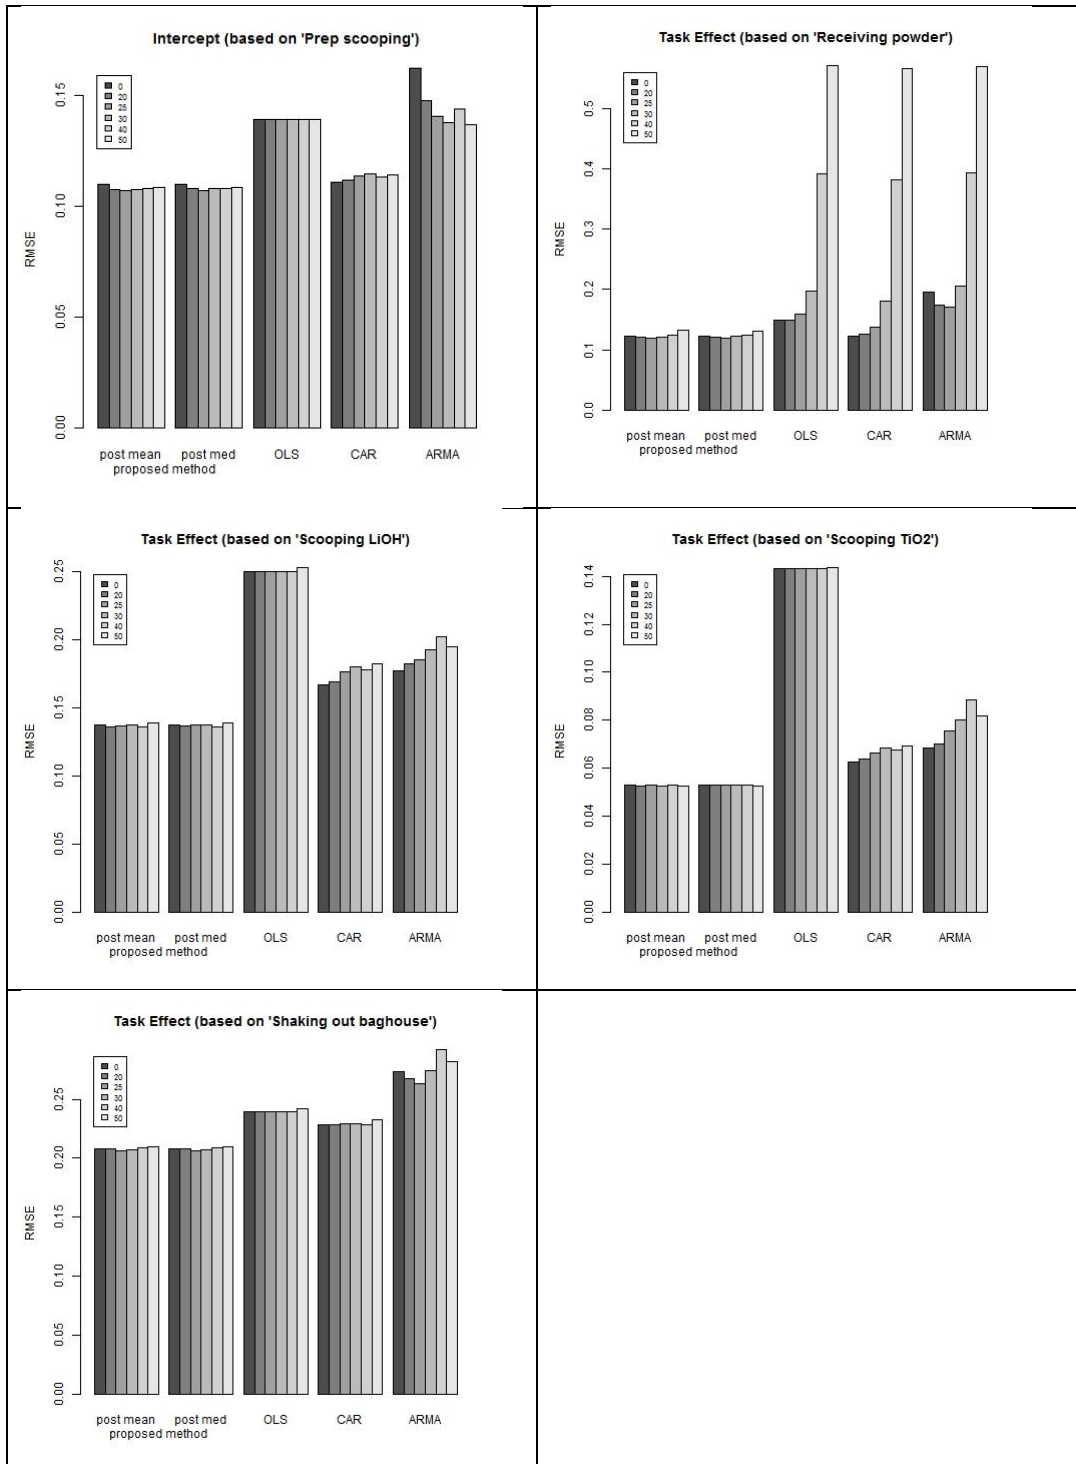

Note: shading represents detection limit used in simulation.

Figure S9: Interval coverage for simulation experiment

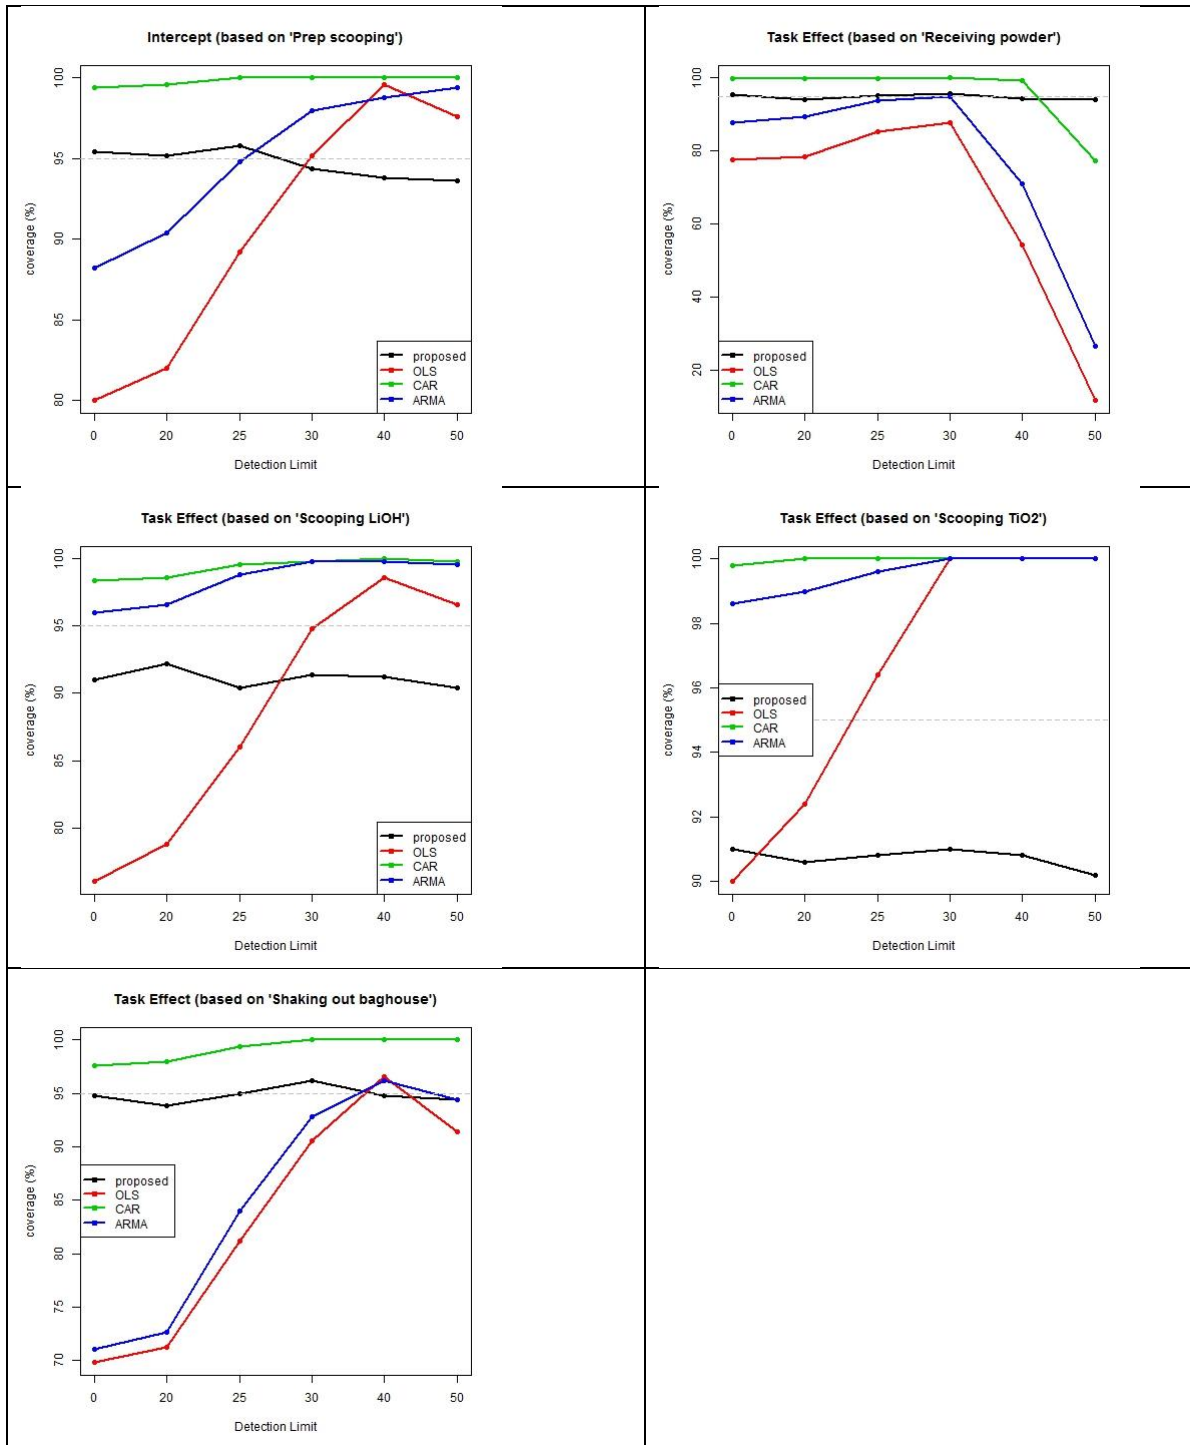



Figure S10: Ratio of standard error or posterior standard deviation to simulation standard deviation

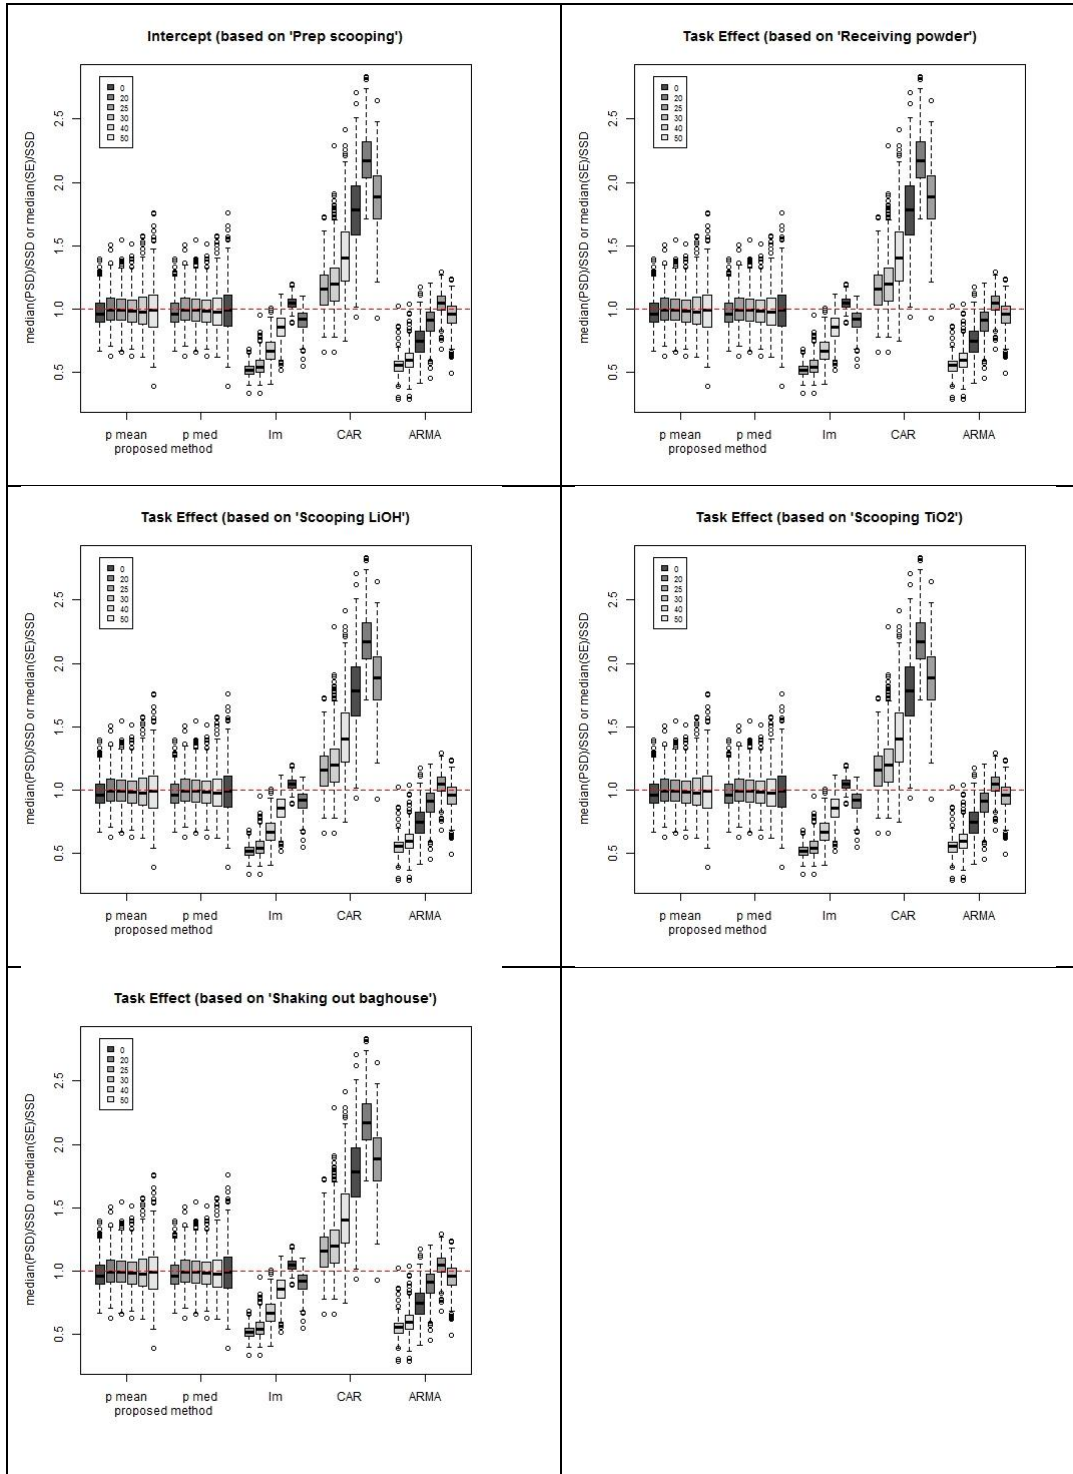

**Figure S11: Root-mean-square-error for simulation experiment with AR(1) errors**

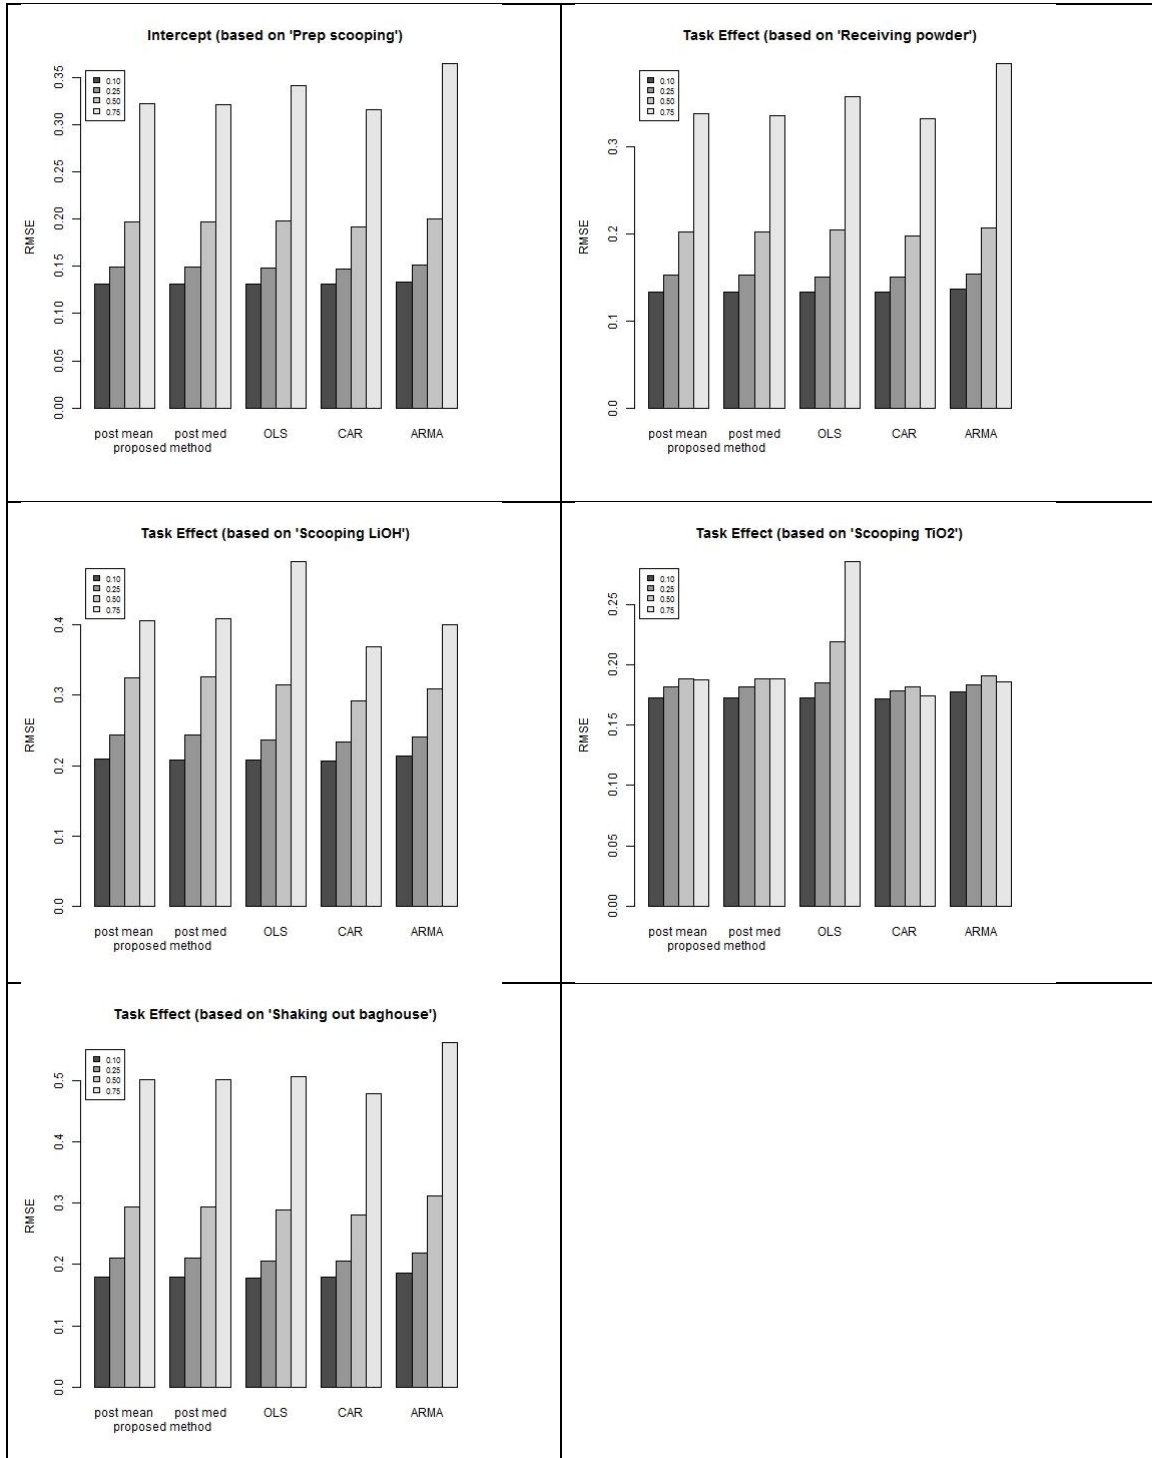

Figure S12: Interval coverage for simulation experiment with AR(1) and AR(2) errors

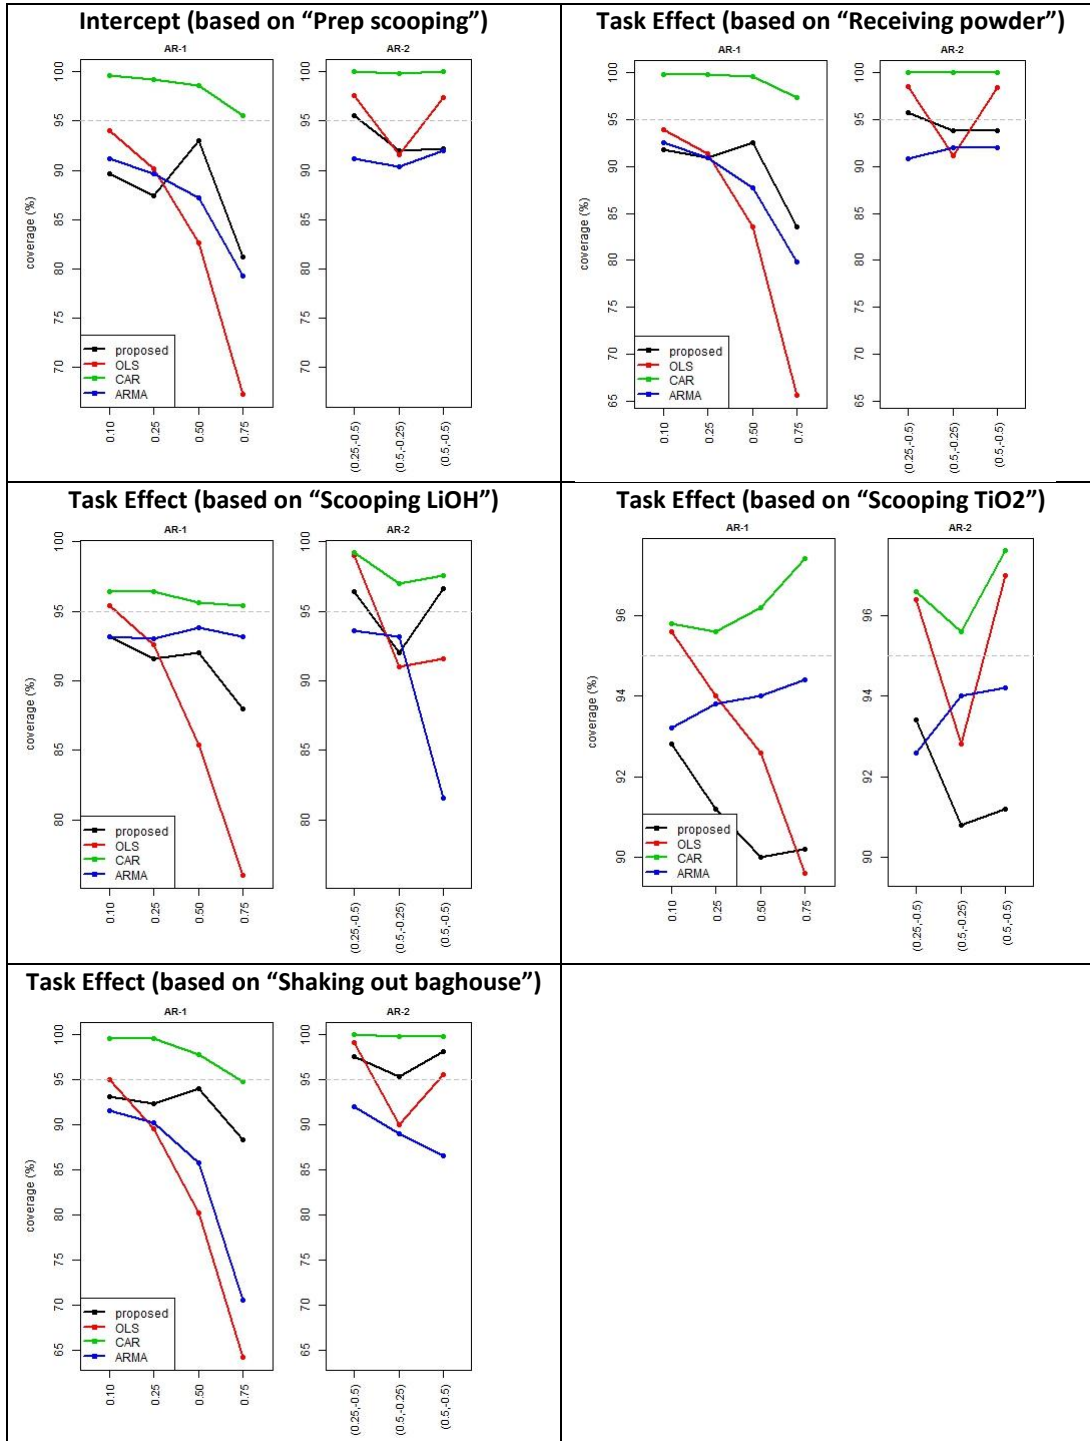

**Figure S13: Ratio of standard error or posterior standard deviation to simulation standard deviation for simulation experiment with AR(1) and AR(2) errors**

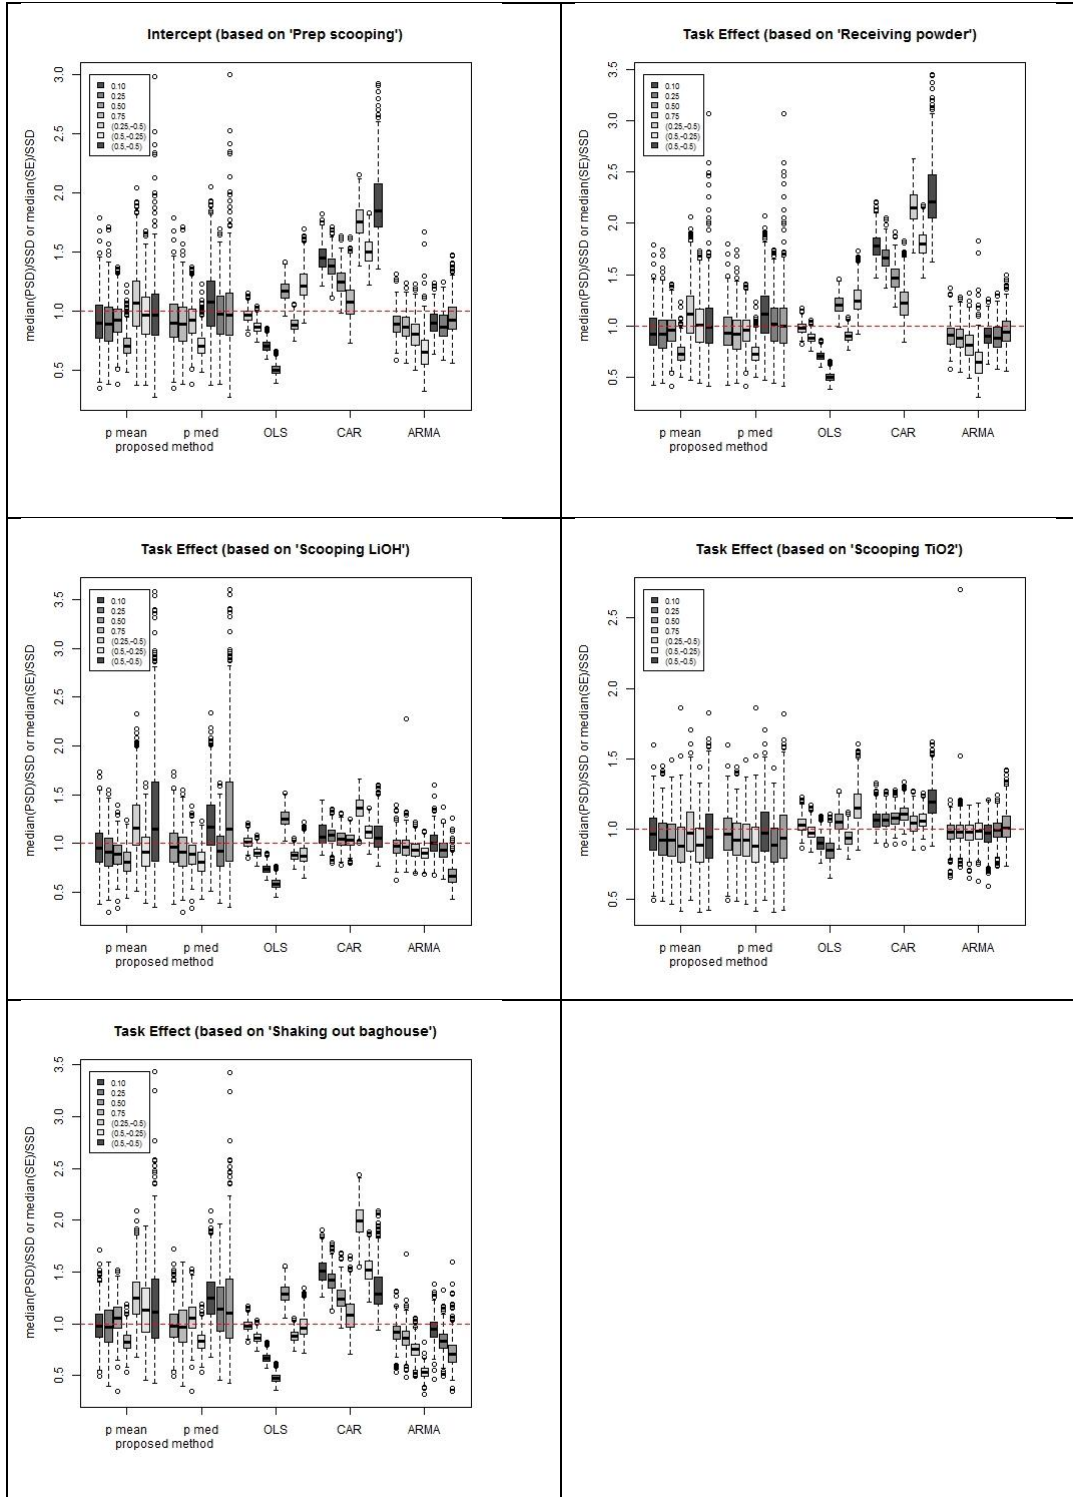

Supplement: NIHMS917910-supplement-Suppl_2.pdf [file NIHMS917910-supplement-Suppl_2.pdf]
